# Supplementary material for: Self–Supporting Mn–RuO2 Nanoarrays for Stable Oxygen Evolution Reaction in Acid
Source: MDPI journal article supplement (doi:10.3390/molecules28237727), 2023-11-23
Supplement: s1 [file s1]

# Self-Supporting Mn–RuO<sub>2</sub> Nanoarrays for Stable Oxygen Evolution Reaction in Acid

Mengting Deng <sup>1,2,†</sup>, Yulong Tang <sup>1,2,†</sup>, Zhiyi Lu <sup>2,3,\*</sup>, Yunan Wang <sup>2,3,\*</sup> and Yichao Lin <sup>2,3,\*</sup>

<sup>1</sup> School of Materials Science & Chemical Engineering, Ningbo University, Ningbo 315211, China

<sup>2</sup> Key Laboratory of Advanced Fuel Cells and Electrolyzers Technology of Zhejiang Province, Ningbo Institute of Materials Technology and Engineering, Chinese Academy of Sciences, Ningbo 315201, China

<sup>3</sup> School of Chemical Science, University of Chinese Academy of Sciences, Beijing 100049, China

\* Correspondence: luzhiyi@nimte.ac.cn (Z.L.); wangyunan@nimte.ac.cn (Y.W.); yclin@nimte.ac.cn (Y.L.);

† These authors contributed equally to this work.

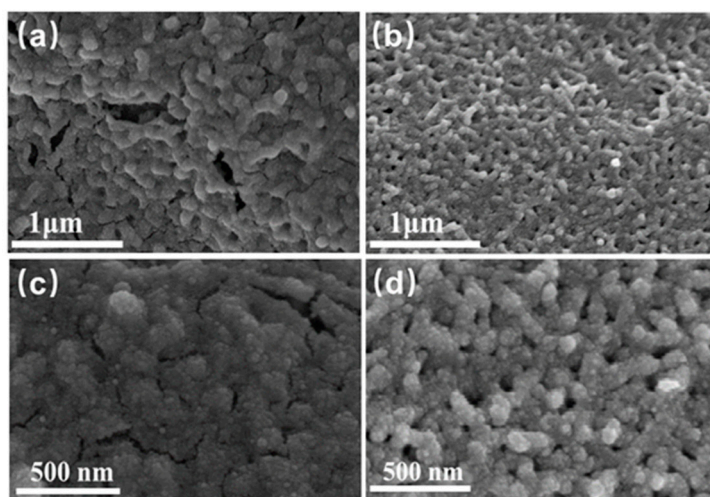

Figure S1: SEM of (a, c) Mn-RuO<sub>2</sub> (250) and (b, d) Mn-RuO<sub>2</sub> (350)

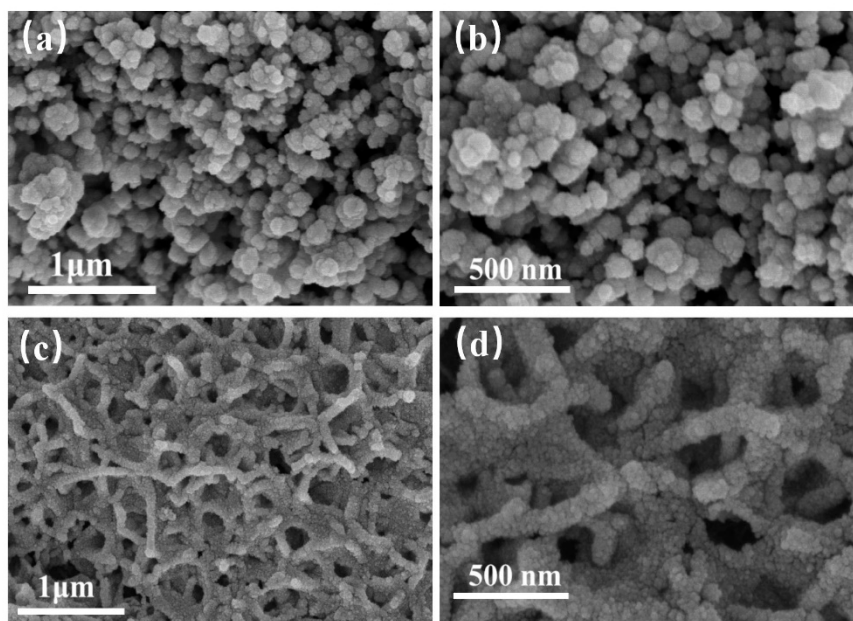

Figure S2. SEM images of commercial RuO<sub>2</sub> (a, b) and Mn-RuO<sub>2</sub> (300) (c, d).

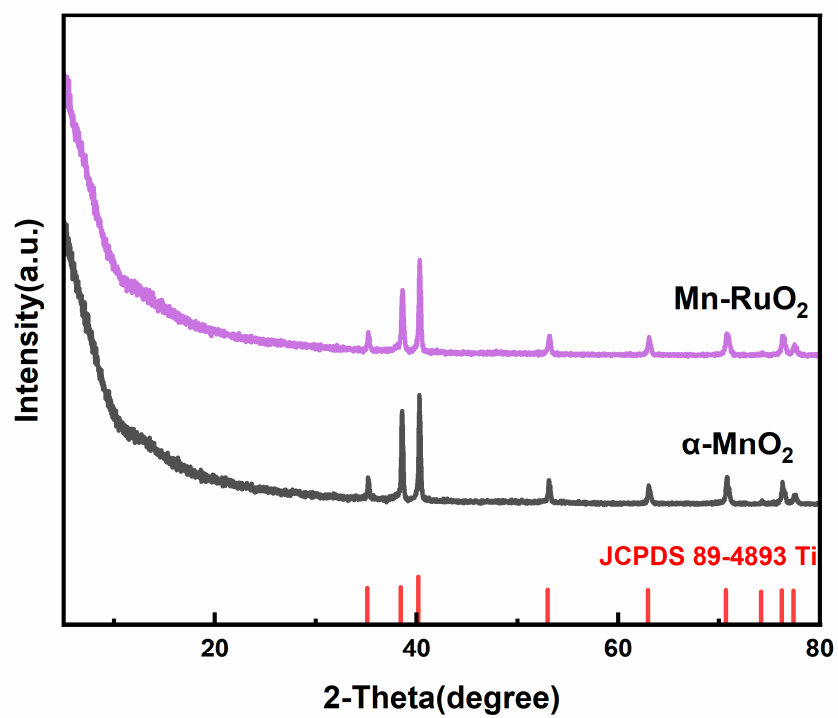

Figure S3. XRD pattern of Mn-RuO<sub>2</sub> (300) and  $\alpha$ -MnO<sub>2</sub> nanoarrays.

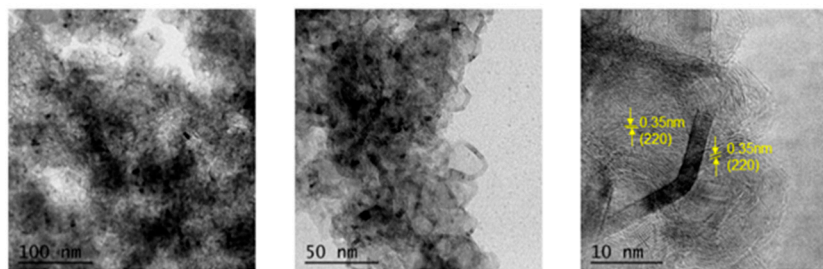

Figure S4: TEM images of  $\alpha$ - $\text{MnO}_2$ .

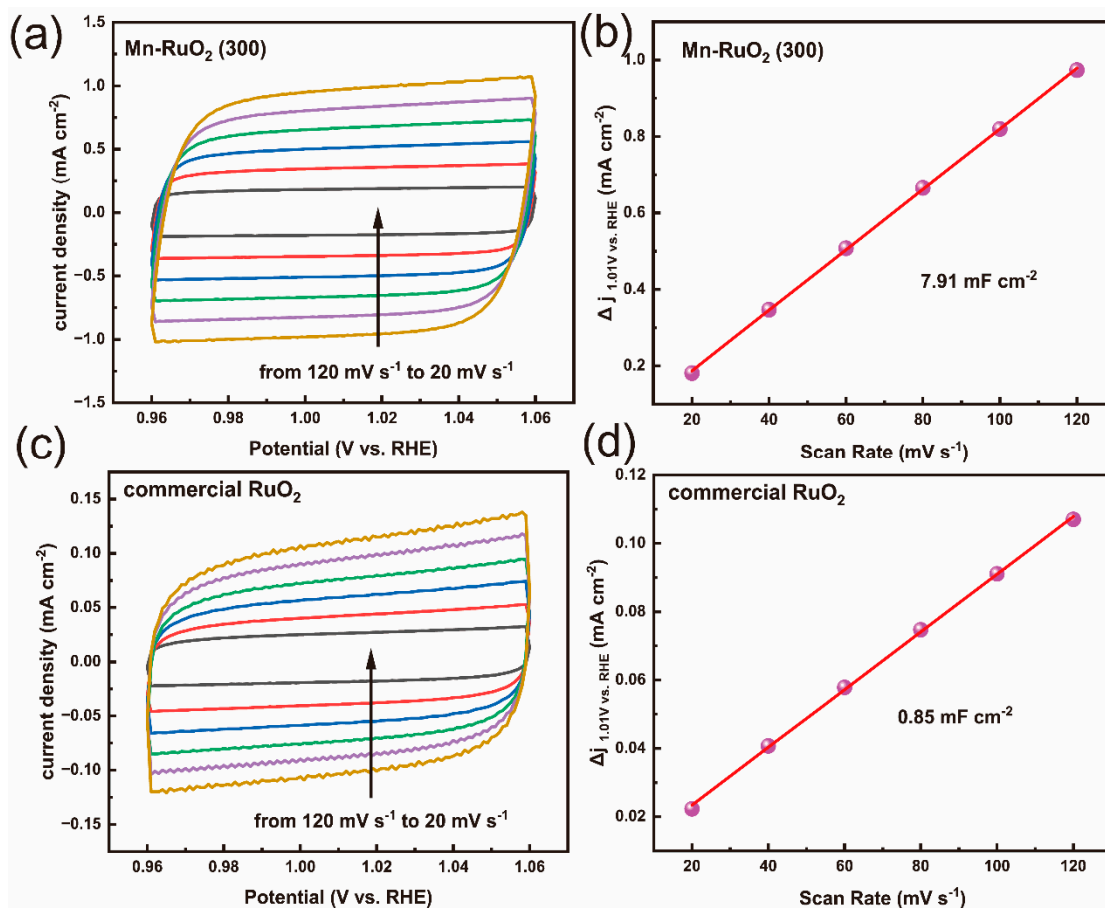

Figure S5. Measurements of the double layer capacitances. (a, b) Mn-RuO<sub>2</sub> (300) nanoarrays, (c, d) commercial RuO<sub>2</sub>.

All CV curves with scan rates ranging from 20 mV s<sup>-1</sup> to 120 mV s<sup>-1</sup> with an interval point of 20 mV s<sup>-1</sup>.

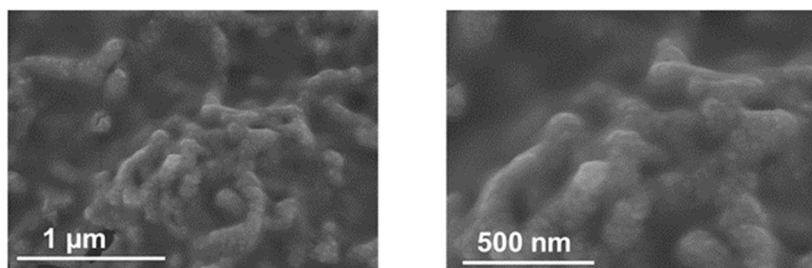

Figure S6: SEM images of Mn-RuO<sub>2</sub> (300) nanoarrays after 100-h chronopotentiometry test.

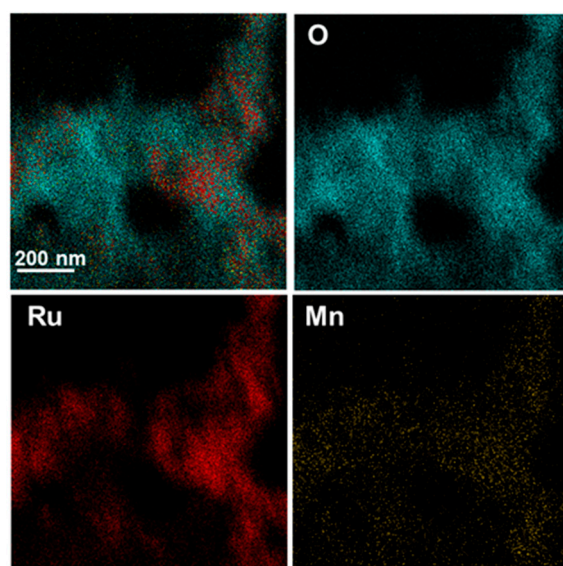

Figure S7: STEM images and elemental mapping images of O, Ru, and Mn of Mn-RuO<sub>2</sub> (300) nanoarrays after chronoamperometry test.

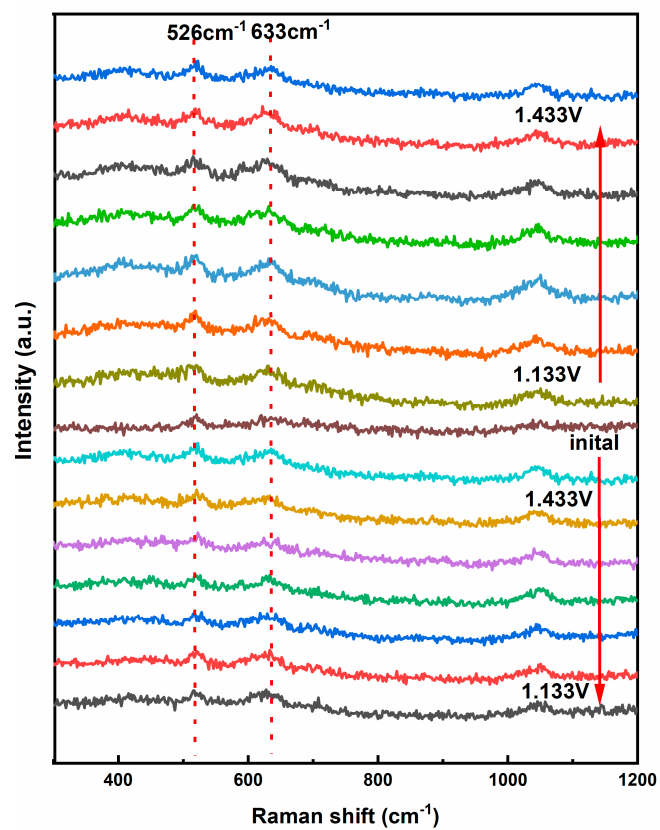

Figure S8. In-situ electrochemical Raman spectra of Mn-RuO<sub>2</sub>(300) nanoarrays.



Table S1: ICP-OES analysis of Mn-RuO<sub>2</sub> (300)

| Sample                    | Ru (mg cm <sup>-2</sup> ) | Mn (mg cm <sup>-2</sup> ) |
|---------------------------|---------------------------|---------------------------|
| Mn-RuO <sub>2</sub> (300) | 0.5                       | 0.01                      |

Table S2: ICP-OES analysis of dissolved Ru after stability test

| Sample              | Ru (mg) |
|---------------------|---------|
| Mn-RuO <sub>2</sub> | 0.0346  |

Table S3: Comparison of OER activities between Mn-RuO<sub>2</sub> (300) and other electrocatalysts in acidic solutions.

| Electrocatalyst                                           | J (mA·cm <sup>-2</sup> ) | Overpotential(mV) | Stability   | Electrolyte                         | Ref.             |
|-----------------------------------------------------------|--------------------------|-------------------|-------------|-------------------------------------|------------------|
| <b>Mn-RuO<sub>2</sub> (300)</b>                           | 10                       | <b>217</b>        | <b>100h</b> | 0.5M H <sub>2</sub> SO <sub>4</sub> | <b>This work</b> |
| R20-Mn                                                    | 10                       | 210               | 20h         | 0.5M H <sub>2</sub> SO <sub>4</sub> | 1                |
| Mesoporous Ir nanosheets                                  | 10                       | 240               | 8h          | 0.5M H <sub>2</sub> SO <sub>4</sub> | 2                |
| Mn-RuO <sub>2</sub>                                       | 10                       | 158               | 5000cycles  | 0.5M H <sub>2</sub> SO <sub>4</sub> | 3                |
| Ir-SA@Fe@NCNT                                             | 10                       | 250               | 11.5h       | 0.5M H <sub>2</sub> SO <sub>4</sub> | 4                |
| Ru-N-C                                                    | 10                       | 267               | 30h         | 0.5M H <sub>2</sub> SO <sub>4</sub> | 5                |
| Ir <sub>0.06</sub> Co <sub>2.94</sub> O <sub>4</sub>      | 10                       | 297               | 200h        | 0.5M H <sub>2</sub> SO <sub>4</sub> | 6                |
| Ru@FLC                                                    | 10                       | 258               | 5000cycles  | 0.5M H <sub>2</sub> SO <sub>4</sub> | 7                |
| IrGa-IMC@IrO <sub>x</sub>                                 | 10                       | 272               | 3000cycles  | 0.1M HClO <sub>4</sub>              | 8                |
| IrRu@Te                                                   | 10                       | 220               | 20h         | 0.5M H <sub>2</sub> SO <sub>4</sub> | 9                |
| RuO <sub>2</sub> /(Co,Mn) <sub>3</sub> O <sub>4</sub> /CC | 10                       | 270               | 24h         | 0.5M H <sub>2</sub> SO <sub>4</sub> | 10               |
| (Ru, Mn) <sub>2</sub> O <sub>3</sub>                      | 10                       | 168               | 40h         | 0.5M H <sub>2</sub> SO <sub>4</sub> | 11               |

## Reference

1. Zhao, Z. B.; Zhang, B.; Fan, D. Y.; Wang, Y. G.; Yang, H. J.; Huang, K.; Pan, X. C.; Zhang, R. M.; Tang, H. L.; Lei, M., Tailoring manganese oxide nanoplates enhances oxygen evolution catalysis in acid. *J Catal.* 2022, 406, 265-272.
2. Cang, B.; Guo, Y.; Kim, J.; Whitten, A. E.; Wood, K.; Kani, K.; Rowan, A. E.; Henzie, J.; Yamauchi, Y., Mesoporous Metallic Iridium Nanosheets. *J. Am. Chem. Soc.* 2018, 140, 12434-12441.
3. Chen, S.; Huang, H.; Jiang, P.; Yang, K.; Diao, J.; Gong, S.; Liu, S.; Huang, M.; Wang, H.; Chen, Q., Mn-Doped RuO<sub>2</sub> Nanocrystals as Highly Active Electrocatalysts for Enhanced Oxygen Evolution in Acidic Media. *ACS Catal.* 2020, 10, 1152-1160.
4. Luo, F.; Hu, H.; Zhao, X.; Yang, Z.; Zhang, Q.; Xu, J.; Kaneko, T.; Yoshida, Y.; Zhu, C.; Cai, W., Robust and Stable Acidic Overall Water Splitting on Ir Single Atoms. *Nano Lett.* 2020, 20, 2120-2128.
5. Cao, L. L.; Luo, Q. Q.; Chen, J. J.; Wang, L.; Lin, Y.; Wang, H. J.; Liu, X. K.; Shen, X. Y.; Zhang, W.; Liu, W.; Qi, Z. M.; Jiang, Z.; Yang, J. L.; Yao, T., Dynamic oxygen adsorption on single-atomic Ruthenium catalyst with high performance for acidic oxygen evolution reaction. *Nat. Commun.* 2019, 10, 4849-4858.
6. Shan, J.; Ye, C.; Chen, S.; Sun, T.; Jiao, Y.; Liu, L.; Zhu, C.; Song, L.; Han, Y.; Jaroniec, M.; Zhu, Y.; Zheng, Y.; Qiao, S.-Z., Short-Range ordered iridium single atoms integrated into cobalt oxide spinel structure for highly efficient electrocatalytic water oxidation. *J. Am. Chem. Soc.* 2021, 143, 5201-5211.
7. Shi, C. X.; Yuan, Y.; Shen, Q.; Yang, X. D.; Cao, B. Q.; Xu, B.; Kang, B. T.; Sun, Y. Q.; Li, C. C., Encapsulated ruthenium nanoparticles activated few-layer carbon frameworks as high robust oxygen evolution electrocatalysts in acidic media. *J. Colloid Interface Sci.* 2022, 612, 488-495.
8. Chen, L. W.; He, F. X.; Shao, R. Y.; Yan, Q. Q.; Yin, P.; Zeng, W. J.; Zuo, M.; He, L. X.; Liang, H. W., Intermetallic IrGa-IrO<sub>x</sub> core-shell electrocatalysts for oxygen evolution. *Nano Res.* 2022, 15 (3), 1853-1860.
9. Xu, J.; Lian, Z.; Wei, B.; Li, Y.; Bondarchuk, O.; Zhang, N.; Yu, Z.; Araujo, A.; Amorim, I.; Wang, Z.; Li, B.; Liu, L., Strong Electronic Coupling between Ultrafine Iridium-Ruthenium Nanoclusters and Conductive, Acid-Stable Tellurium Nanoparticle Support for Efficient and Durable Oxygen Evolution in Acidic and Neutral Media. *ACS Catal.* 2020, 10, 3571-3579.
10. Niu, S. Q.; Kong, X. P.; Li, S. W.; Zhang, Y. Y.; Wu, J.; Zhao, W. W.; Xu, P., Low Ru loading RuO<sub>2</sub>/(Co,Mn)<sub>(3)</sub>O<sub>x-4</sub> nanocomposite with modulated electronic structure for efficient oxygen evolution reaction in acid. *Appl. Catal. B.* 2021, 297, 926-934.
11. Qin, Y.; Cao, B.; Zhou, X.-Y.; Xiao, Z.; Zhou, H.; Zhao, Z.; Weng, Y.; Lv, J.; Liu, Y.; He, Y.-B.; Kang, F.; Li, K.; Zhang, T.-Y., Orthorhombic (Ru, Mn)<sub>2</sub>O<sub>3</sub>: A superior electrocatalyst for acidic oxygen evolution reaction. *Nano Energy.* 2023, 115, 108727.
